# Supplementary material for: Perceived Barriers to Treatment for Alcohol Problems: A Latent Class Analysis
Source: Atypon-hosted journal article supplement (doi:10.1176/appi.ps.201400160), 2015-08-03
Supplement: appi.ps.201400160.ds001.pdf [file appi.ps.201400160.ds001.pdf]

 


Psychiatry Online
