# Supplementary material for: Perceived Barriers to Treatment for Alcohol Problems: A Latent Class Analysis
Source: Atypon-hosted journal article supplement (doi:10.1176/appi.ps.201400160), 2015-08-03

**Online Appendix.** Flowchart showing how the study sample (N=1,053) was selected using data from the National Epidemiologic Survey on Alcohol and Related Conditions 2001-2002.

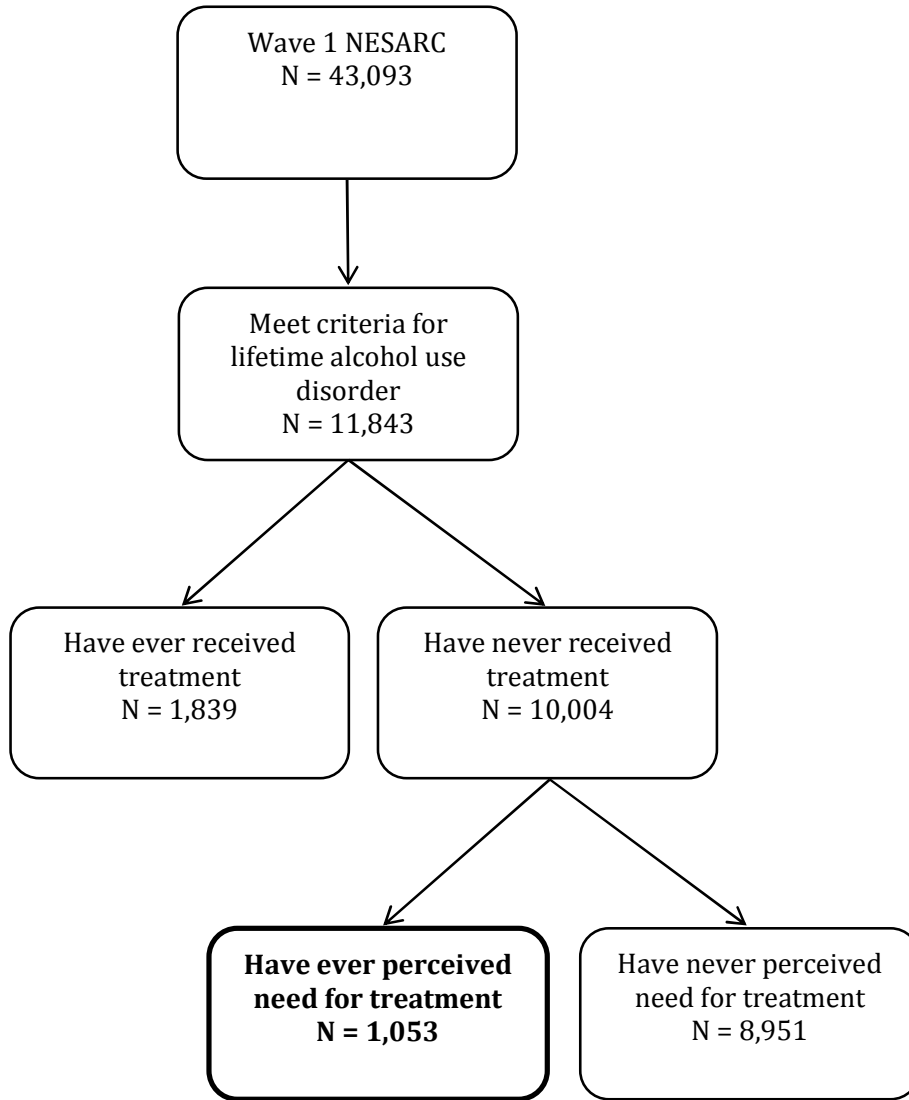

Supplement: appi.ps.201400160.ds001.pdf [file appi.ps.201400160.ds001.pdf]
